# Supplementary material for: Deletion of biosynthetic genes, specific SNP patterns and differences in transcript accumulation cause variation in hydroxynitrile glucoside content in barley cultivars
Source: PubMed Central journal article supplement (PMC6450869; doi:10.1038/s41598-019-41884-w), 2019-04-05
Supplement: 41598_2019_41884_MOESM1_ESM.pdf [file 41598_2019_41884_MOESM1_ESM.pdf]

## **Deletion of biosynthetic genes, specific SNP patterns and differences in transcript accumulation cause variation in hydroxynitrile glucoside content in barley cultivars**

Marcus Ehlert<sup>1,2,#</sup>, Lea Møller Jagd<sup>3,#</sup>, Ilka Braumann<sup>3</sup>, Christoph Dockter<sup>3</sup>, Christoph Crocoll<sup>4</sup>, Mohammed Saddik Motawia<sup>1,2</sup>, Birger Lindberg Møller<sup>1,2</sup>, Michael Foged Lyngkjær<sup>1,2,\*</sup>

<sup>1</sup>Plant Biochemistry Laboratory, Department of Plant and Environmental Sciences, University of Copenhagen, Thorvaldsensvej 40, 1871 Frederiksberg C, Copenhagen, Denmark.

<sup>2</sup>VILLUM Research Center for Plant Plasticity, University of Copenhagen, Thorvaldsensvej 40, 1871 Frederiksberg C, Copenhagen, Denmark.

<sup>3</sup>Carlsberg Research Laboratory, J.C. Jacobsens Gade 4, 1799 Copenhagen V, Denmark.

<sup>4</sup>DynaMo Center, Department of Plant and Environmental Sciences, University of Copenhagen, Thorvaldsensvej 40, 1871 Frederiksberg C, Denmark.

<sup>#</sup>These authors contributed equally to the work.

<sup>\*</sup>Corresponding author: Michael Foged Lyngkjær (mlyn@plen.ku.dk)

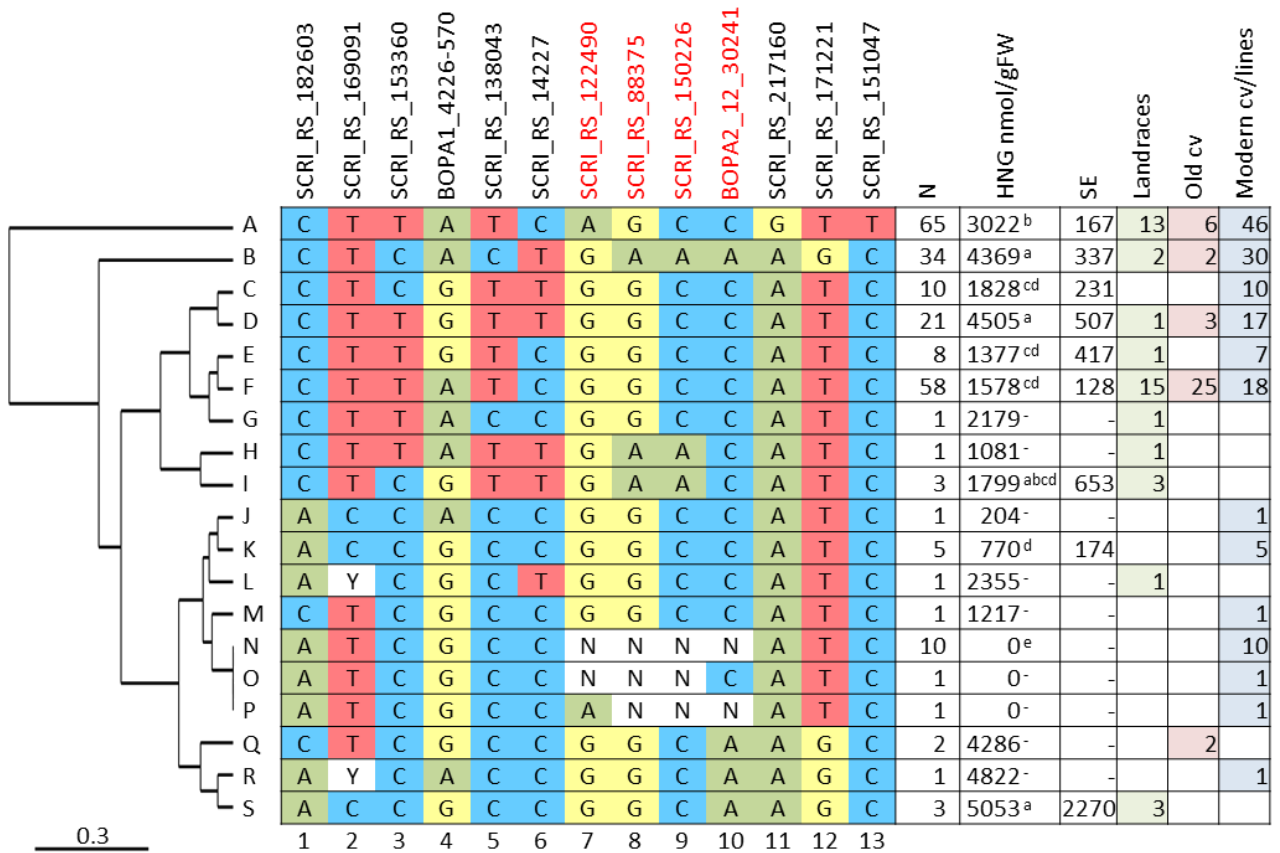

**Supplementary Figure S1. SNP variation of 227 barley lines based on 13 SNP markers located within or in close proximity to the hydroxynitrile glucoside biosynthesis gene cluster.**

Sequence relationship of the different SNP patterns (A-S) identified is listed together with the number (N) of lines sharing the particular SNP pattern, their average total hydroxynitrile glucoside (HNG) content in nmol per gram fresh weight (nmol/gFW) (Knoch *et al.*, 2016), standard error (SE) and distribution in landraces, old cultivars (Old cv), and modern cultivars and breeding lines (Modern cv/lines). Names of SNP markers are given above the columns and the numbers below correspond to their chromosome location in Figure 1. Different small letters next to the average total HNG contents indicate significantly different values according to t-statistic. Only SNP patterns shared by at least 3 barley lines were included in the statistical analysis.

## CYP79A12

|                     |                                      |                             |                            |                     |               |            |                  |               |        |     |  |
|---------------------|--------------------------------------|-----------------------------|----------------------------|---------------------|---------------|------------|------------------|---------------|--------|-----|--|
|                     |                                      | 20                          |                            | 40                  |               | 60         |                  | 80            |        | 100 |  |
| HORVU1Hr1G007900.1  | MTMVAALGLCSSSFFHVVMVAVMYVVRRL        | ----                        | CSSAPGALPPGPCPWPVVGSLPELKF | FNKLP               | AFRWIHQVMEK   | MNTD       | IACFRLGGVHV      | I             | ITCPRI | 95  |  |
| cv. Pallas          | .....                                | S                           | M                          | L                   | .....         | GSKWT      | .....            | D             | .....  | 95  |  |
| cv. Mentor          | .....                                | S                           | M                          | L                   | .....         | GSKWT      | .....            | D             | .....  | 95  |  |
| AK354819.1          | .....                                | S                           | M                          | L                   | .....         | GSKWT      | .....            | D             | .....  | 95  |  |
| bowman_contig_68899 | .....                                | S                           | M                          | L                   | .....         | GSKWT      | .....            | D             | .....  | 97  |  |
| FJ593638.1          | .....                                | S                           | M                          | L                   | .....         | GSKWT      | .....            | D             | .....  | 82  |  |
|                     |                                      | 120                         |                            | 140                 |               | 160        |                  | 180           |        | 200 |  |
| HORVU1Hr1G007900.1  | AREVLKKQDEIFASRPETFASCVASGGYVEAAL    | LAPFGVQSTKMRRVLTSD          | I                          | ISPSRHKWLHDKRVEE    | ADN           | ISWY       | IYNLTGGEEGGNV    | DVRHLSRHYCGNV | 195    |     |  |
| cv. Pallas          | .....                                | .....                       | .....                      | .....               | .....         | .....      | .....            | M             | .....  | 195 |  |
| cv. Mentor          | .....                                | .....                       | .....                      | .....               | .....         | .....      | .....            | M             | .....  | 195 |  |
| AK354819.1          | .....                                | .....                       | .....                      | .....               | .....         | .....      | .....            | M             | .....  | 195 |  |
| bowman_contig_68899 | .....                                | .....                       | .....                      | .....               | .....         | .....      | .....            | M             | .....  | 197 |  |
| FJ593638.1          | .....                                | .....                       | .....                      | .....               | .....         | .....      | .....            | M             | .....  | 182 |  |
|                     |                                      | 220                         |                            | 240                 |               | 260        |                  | 280           |        | 300 |  |
| HORVU1Hr1G007900.1  | IRRLLFQTRYFGEAGHGGGPKLEMEHMDASFAAQGI | LYSFCISDYLP                 | SLGLDLDGHEKIVKD            | ANAVLDR             | LHDGVI        | DERWKQWK   | KAGERGEVQDFLDVLI | 295           |        |     |  |
| cv. Pallas          | .....                                | .....                       | V                          | .....               | .....         | .....      | .....            | .....         | 295    |     |  |
| cv. Mentor          | .....                                | .....                       | V                          | .....               | .....         | .....      | .....            | .....         | 295    |     |  |
| AK354819.1          | .....                                | .....                       | V                          | .....               | .....         | .....      | .....            | R             | .....  | 295 |  |
| bowman_contig_68899 | .....                                | .....                       | V                          | .....               | .....         | .....      | .....            | .....         | .....  | 297 |  |
| FJ593638.1          | .....                                | .....                       | V                          | .....               | .....         | .....      | .....            | .....         | .....  | 282 |  |
|                     |                                      | 320                         |                            | 340                 |               | 360        |                  | 380           |        | 400 |  |
| HORVU1Hr1G007900.1  | TRRDPRLTMEEVKAQAKLINLAAVDNPSNAE      | WALAEWVAEMVKNPELLGRAAEELDRV | VGRERQVQESD                | IPQLNYVKACIREAFRLHP | IAPFN         | VPHVALADTV | 395              |               |        |     |  |
| cv. Pallas          | .....                                | .....                       | .....                      | .....               | .....         | .....      | .....            | .....         | 395    |     |  |
| cv. Mentor          | .....                                | .....                       | .....                      | .....               | .....         | .....      | .....            | .....         | 395    |     |  |
| AK354819.1          | .....                                | .....                       | .....                      | .....               | .....         | .....      | .....            | .....         | 395    |     |  |
| bowman_contig_68899 | .....                                | .....                       | .....                      | .....               | .....         | .....      | .....            | .....         | .....  | 397 |  |
| FJ593638.1          | .....                                | .....                       | .....                      | .....               | .....         | .....      | .....            | .....         | .....  | 382 |  |
|                     |                                      | 420                         |                            | 440                 |               | 460        |                  | 480           |        | 500 |  |
| HORVU1Hr1G007900.1  | VAGYRVPKGSVLLSRLGLGRNPAIWDPLRF       | NPRHLEGAGGNLELTENE          | LRFISFSTGR                 | RGCVAPMLGTAMT       | VMLFGRLLHGFTW | SKPAEM     | MDIQLTE          | 495           |        |     |  |
| cv. Pallas          | .....                                | .....                       | .....                      | .....               | .....         | .....      | .....            | .....         | 495    |     |  |
| cv. Mentor          | .....                                | .....                       | .....                      | .....               | .....         | .....      | .....            | .....         | 495    |     |  |
| AK354819.1          | .....                                | .....                       | .....                      | .....               | .....         | .....      | .....            | .....         | 495    |     |  |
| bowman_contig_68899 | .....                                | .....                       | .....                      | .....               | .....         | .....      | .....            | .....         | .....  | 497 |  |
| FJ593638.1          | .....                                | .....                       | .....                      | .....               | .....         | .....      | .....            | .....         | .....  | 482 |  |
|                     |                                      | 520                         |                            |                     |               |            |                  |               |        |     |  |
| HORVU1Hr1G007900.1  | SHNDLSMAKPLVLHAKPRLPLHLRYRP          | 521                         |                            |                     |               |            |                  |               |        |     |  |
| cv. Pallas          | .....                                | 521                         |                            |                     |               |            |                  |               |        |     |  |
| cv. Mentor          | .....                                | 521                         |                            |                     |               |            |                  |               |        |     |  |
| AK354819.1          | .....                                | 521                         |                            |                     |               |            |                  |               |        |     |  |
| bowman_contig_68899 | .....                                | 523                         |                            |                     |               |            |                  |               |        |     |  |
| FJ593638.1          | .....                                | 508                         |                            |                     |               |            |                  |               |        |     |  |

## CYP79A8

|                      |                                 |                             |                                   |                   |                    |               |                  |          |       |     |  |
|----------------------|---------------------------------|-----------------------------|-----------------------------------|-------------------|--------------------|---------------|------------------|----------|-------|-----|--|
|                      |                                 | 20                          |                                   | 40                |                    | 60            |                  | 80       |       | 100 |  |
| HORVU1Hr1G007400.1   | MVVGLSWSWSCISWL                 | VMLVMI                      | VVVRRLSSMWTCCSCGSLPPGSPWPVVGSLPEL | MFNKPAFRWIIHHVMEK | MGTDI              | ACFRFGGVHVIS  | ITCPRI           | AREVLKK  | 100   |     |  |
| Emir                 | .....                           | .....                       | .....                             | .....             | .....              | .....         | .....            | .....    | ..... | 100 |  |
| Pallas               | .....                           | .....                       | .....                             | .....             | .....              | .....         | .....            | .....    | ..... | 100 |  |
| Mentor               | .....                           | .....                       | .....                             | .....             | .....              | .....         | .....            | .....    | ..... | 100 |  |
| bowman_contig_873946 | .....                           | .....                       | .....                             | .....             | .....              | .....         | .....            | .....    | ..... | 100 |  |
| FJ455416.1           | .....                           | .....                       | .....                             | .....             | .....              | .....         | .....            | .....    | ..... | 100 |  |
|                      |                                 | 120                         |                                   | 140               |                    | 160           |                  | 180      |       | 200 |  |
| HORVU1Hr1G007400.1   | QDEIFASRPVTFASCVASGGYVEAALAPFGE | QSTKMRRVLTSH                | I                                 | VSPSRHKWLHDKRAEE  | ADNI               | TWYMYNLTGEEG  | SNVDVRHLARHYCGNV | IRRLLFGR | 200   |     |  |
| Emir                 | .....                           | .....                       | .....                             | .....             | .....              | .....         | .....            | .....    | ..... | 200 |  |
| Pallas               | .....                           | .....                       | .....                             | .....             | .....              | .....         | .....            | .....    | ..... | 200 |  |
| Mentor               | .....                           | .....                       | .....                             | .....             | .....              | .....         | .....            | .....    | ..... | 200 |  |
| bowman_contig_873946 | .....                           | .....                       | .....                             | .....             | .....              | .....         | .....            | .....    | ..... | 200 |  |
| FJ455416.1           | .....                           | .....                       | .....                             | .....             | .....              | .....         | .....            | .....    | ..... | 200 |  |
|                      |                                 | 220                         |                                   | 240               |                    | 260           |                  | 280      |       | 300 |  |
| HORVU1Hr1G007400.1   | RYFGEAGDGGGPKLEMEHIDASFAAQGI    | LYSFCVSDYLP                 | SLGLDLDGHEKIVKMANAAL              | DRLHDAVI          | DERRRQWDS          | GKQTQVDDFLDVL | ITL              | TEPTLT   | 300   |     |  |
| Emir                 | .....                           | .....                       | .....                             | .....             | .....              | .....         | .....            | .....    | ..... | 300 |  |
| Pallas               | .....                           | .....                       | .....                             | .....             | .....              | .....         | .....            | .....    | ..... | 300 |  |
| Mentor               | .....                           | .....                       | .....                             | .....             | .....              | .....         | .....            | .....    | ..... | 300 |  |
| bowman_contig_873946 | .....                           | .....                       | .....                             | .....             | .....              | .....         | .....            | .....    | ..... | 300 |  |
| FJ455416.1           | .....                           | .....                       | .....                             | .....             | .....              | .....         | .....            | .....    | ..... | 300 |  |
|                      |                                 | 320                         |                                   | 340               |                    | 360           |                  | 380      |       | 400 |  |
| HORVU1Hr1G007400.1   | MEVKAQAKLINLAAVDNPSNAE          | WALAEWVAEMVKSPELLARAAEELDRV | VGRERQVQESD                       | I                 | AELNYVKACIREAFRLHP | IAPFN         | VPHVARADTV       | VAGYRVPK | 400   |     |  |
| Emir                 | .....                           | .....                       | .....                             | .....             | .....              | .....         | .....            | .....    | ..... | 400 |  |
| Pallas               | .....                           | .....                       | .....                             | .....             | .....              | .....         | .....            | .....    | ..... | 400 |  |
| Mentor               | .....                           | .....                       | .....                             | .....             | .....              | .....         | .....            | .....    | ..... | 400 |  |
| bowman_contig_873946 | .....                           | .....                       | .....                             | .....             | .....              | .....         | .....            | .....    | ..... | 400 |  |
| FJ455416.1           | .....                           | .....                       | .....                             | .....             | .....              | .....         | .....            | .....    | ..... | 400 |  |
|                      |                                 | 420                         |                                   | 440               |                    | 460           |                  | 480      |       | 500 |  |
| HORVU1Hr1G007400.1   | GSHVLLSRLGLGRNPA                | TWDDPLRFN                   | PERHMGEGGNLELTENDLRF              | ISFSTGRRCVAP      | MLGTAMS            | VMLFGRLLHGFTW | TKPAGVPIQL       | TESEHNL  | LSM   | 500 |  |
| Emir                 | .....                           | .....                       | .....                             | .....             | .....              | .....         | .....            | .....    | ..... | 500 |  |
| Pallas               | .....                           | .....                       | .....                             | .....             | .....              | .....         | .....            | .....    | ..... | 500 |  |
| Mentor               | .....                           | .....                       | .....                             | .....             | .....              | .....         | .....            | .....    | ..... | 500 |  |
| bowman_contig_873946 | .....                           | .....                       | .....                             | .....             | .....              | .....         | .....            | .....    | ..... | 500 |  |
| FJ455416.1           | .....                           | .....                       | .....                             | .....             | .....              | .....         | .....            | .....    | ..... | 500 |  |
|                      |                                 | 420                         |                                   | 440               |                    | 460           |                  | 480      |       | 500 |  |
| HORVU1Hr1G007400.1   | ANPLVLHARPRPLHLRYRP             | 519                         |                                   |                   |                    |               |                  |          |       |     |  |
| Emir                 | .....                           | 519                         |                                   |                   |                    |               |                  |          |       |     |  |
| Pallas               | .....                           | 519                         |                                   |                   |                    |               |                  |          |       |     |  |
| Mentor               | .....                           | 519                         |                                   |                   |                    |               |                  |          |       |     |  |
| bowman_contig_873946 | .....                           | 519                         |                                   |                   |                    |               |                  |          |       |     |  |
| FJ455416.1           | .....                           | 519                         |                                   |                   |                    |               |                  |          |       |     |  |

# CYP71U5

20 40 60 80 100  
HORVU1Hr1G007420.5 MDM DQLS YGSLWVMVA T A L F W L I L R K A I Y V G G K D D T G A K A K L P P G P W N L P V I G S L H L H V V T K L P P H R A L L R L S R R H G P L M L V W L G E V P S I V V S S P E A A K 100  
Emir ..... 100  
Pallas ..... 100  
Mentor ..... 100  
bowman\_contig\_878553 ..... 100

120 140 160 180 200  
HORVU1Hr1G007420.5 E V L K T N D L V F A N R P C G P T M D I V S C G G K G I L L A P Y G D H W R Q M R K V C V V E L S A R Q V R R I E S I Q Q A E V A R L L E S V S A A A T G C A V V D V G K A L A E L S S N I I A T A 200  
Emir ..... P ..... 200  
Pallas ..... P ..... 200  
Mentor ..... P ..... 200  
bowman\_contig\_878553 ..... P ..... 200

220 240 260 280 300  
HORVU1Hr1G007420.5 V F G G K F P Q Q E A F L R E I D A L S V L V G G F S M A D L F P S S R L V R W L S S A T H D V K R S H A R V Q R I L E D I I Q E R K E K T S K N G A S S V A R D N E D L L D V L L R L Q R D D T L N F 300  
Emir ..... A ..... 300  
Pallas ..... A ..... S ..... 300  
Mentor ..... A ..... S ..... 300  
bowman\_contig\_878553 ..... A ..... S ..... 300

320 340 360 380 400  
HORVU1Hr1G007420.5 P L T S E I I D C V I R D I I G A A T E T T S S I T I E W A M A E L V G N P E A M A K A K H E V R E R C H V V A S A D I G E L Q Y L R M V I K E T L R L H P A G M F H R A S L E D C Q V M G Y H I P K G 400  
Emir ..... 400  
Pallas ..... 400  
Mentor ..... 400  
bowman\_contig\_878553 ..... 400

420 440 460 480 500  
HORVU1Hr1G007420.5 T A V M I N G F A V G T D P A H W G E D A G E F R P E R F H D M E M T E Y M Q M E F V P F G A G R R O C P G T L F A T T I M E L V L A H L L C H F D W E V P D G Q T L D M G E D Y G F I V H T R S S L R 500  
Emir ..... S ..... N ..... T ..... E ..... 500  
Pallas ..... S ..... N ..... T ..... E ..... 500  
Mentor ..... S ..... N ..... T ..... E ..... 500  
bowman\_contig\_878553 ..... S ..... N ..... T ..... E ..... 500

HORVU1Hr1G007420.5 L Q A S S I V P S C 510  
Emir ..... 510  
Pallas ..... 510  
Mentor ..... 510  
bowman\_contig\_878553 ..... 510

# CYP71L1

20 40 60 80 100  
HORVU1Hr1G007830.1 M A A A S L V L E L L R Q Q W Q V T V A I L L L P L A S F L L T R R R S S N L N G C N E S G G L R L P P C P W R L P M V G N L H Q I G S L P H R D L A R L A R R H G P V M M V R L G M V P A V V L S T A 100  
cv. Pallas ..... D ..... 100  
cv. Mentor ..... D ..... 100  
AK248375.1 ..... D ..... 100

120 140 160 180 200  
HORVU1Hr1G007830.1 A A A E E A F K T N D K D C S S R P L T V G P G K L T Y G Y K D V V F A P W S D Y V R E M R K L F I I E M L S A R R V K A A Y F A R E T Q I E R M V A K L E A V G P N P I R I D E H I F T T V D A I V S 200  
cv. Pallas ..... 200  
cv. Mentor ..... 200  
AK248375.1 ..... 200

220 240 260 280 300  
HORVU1Hr1G007830.1 L F V F G E L N A G E Q F K G E L V D L L N E T T D L L T S I F T A E D Y F P N A A G R L I D R I T G M H G R R E T L F R K L D S M M E Y L L A M Y E D P G H K R K A D A D G S D L V O E V V D L M K R P 300  
cv. Pallas ..... 300  
cv. Mentor ..... 300  
AK248375.1 ..... 300

320 340 360 380 400  
HORVU1Hr1G007830.1 P A K G M I T F T R D H A K S I L F D T F M A A T D T S S I S S Y W V M T E L I R H P R V L H K A Q A E V R A A A G G A P Q V R I S D M P K L K Y L R M V L S E T F R M H P P A T M L V P R E T M R P I 400  
cv. Pallas ..... 400  
cv. Mentor ..... 400  
AK248375.1 ..... 400

420 440 460 480 500  
HORVU1Hr1G007830.1 R L G G Y D I P A N T M L M V N A W A I G R D P A S W K D P E V F Y P E R F E E L D V D F N G G H Y E L L P F G A G R R I C P G L A M G V A N T E F I L A N L Y C F N W A L P Q G M R S E D V G V E E 500  
cv. Pallas ..... 500  
cv. Mentor ..... 500  
AK248375.1 ..... 500

520  
HORVU1Hr1G007830.1 F G G L T F R K K K P L V L V P T R Y Y P D K E E K 526  
cv. Pallas ..... 526  
cv. Mentor ..... 526  
AK248375.1 ..... 526

# CYP71C103

```
                20      40      60      80      100
HORVU1Hr1G007840.2 MEVPHADAALLVLLAS I LLLMARRRFG LGNAARAREE EALNKLPSPGWRLP V I GHLHQVGP LPHVSLRHLAAEHGRDGLMLVRLGAVPTLVVSTPAAQA 100
cv. Pallas .....
cv. Mentor .....
AK360412.1 .....
bowman_contig_221370 .....

                120      140      160      180      200
HORVU1Hr1G007840.2 VLRTHDHFV A SRPHSPVAH I L F Y G S A D V V F A P Y G H H W R Q V K K I S T T H L L T A R K V H S Y R H A R Q H E V N L V L A K V R D A M R A G V A L D M S E L L N A F V F D I V C H A V 200
cv. Pallas .....
cv. Mentor .....
AK360412.1 .....
bowman_contig_221370 .....

                220      240      260      280      300
HORVU1Hr1G007840.2 A G N S F R E R G L N K H F R E L V E A N A S L I G G F N L E D H F P A L V K L E I F R K I V C A K A R R V N K W D D L D R L I D E H A T P P A L D E D R D F I H V L L S V Q Q E Y N L T R D H I K 300
cv. Pallas .....
cv. Mentor .....
AK360412.1 .....
bowman_contig_221370 .....

                320      340      360      380      400
HORVU1Hr1G007840.2 A Q L L I M F E A G T D T S I I V L E Y A M V R L M Q N P R V M A M L Q A E V R S T I P K G K D V T Q D D L H G L P Y L K A V I K E T L R L H M P G L M V P H L S M D E C I I N G Y T I P S G T R T 400
cv. Pallas .....
cv. Mentor .....
AK360412.1 .....
bowman_contig_221370 .....

                420      440      460      480      500
HORVU1Hr1G007840.2 F I N T Y A I Q R D P S N W S E P E E F M P E R F M E G G S A A A M D Y K G N D F Q Y F P F G S G R R I C P G I N F A T A T I Q L M L T N L M Y H F D W K L P P E S E E G I N M T E T B G L T V H R K 500
cv. Pallas .....
cv. Mentor .....
AK360412.1 .....
bowman_contig_221370 .....

HORVU1Hr1G007840.2 E K L L L V P L V P Q N 512
cv. Pallas ..... 512
cv. Mentor ..... 512
AK360412.1 ..... 512
bowman_contig_221370 ..... 512
```

# CYP71C113

```
                20      40      60      80      100
HORVU1Hr1G007790.1 M G E V P S D E L L L V L V S A A L L V T I L V M V R R S G S A A R V R E E L L R K L P S P G W L P V I G H L H M V G S Q P H V S L G D L A A K H S R D G L M L L R L G S V P T L I V T S S N A A R A 100
cv. Pallas .....
cv. Mentor .....
AK355475.1 .....
bowman_contig_846052 .....

                120      140      160      180      200
HORVU1Hr1G007790.1 V L R T H D D V F A S R P H N P A T D I I F Y G P S D I A F C P Y G D H W R Q V K K I A M T H L L T A N K V R S Y R Q A R E E E A C L V V A K L R D A M A G A A L D L G E L L S A F S T N I V G H A V 200
cv. Pallas .....
cv. Mentor .....
AK355475.1 .....
bowman_contig_846052 .....

                220      240      260      280      300
HORVU1Hr1G007790.1 C G K S F R Q K G H E K L F R E L V E T N S L L I G G F N V G D Y F P E L L K L D I I R W M V C G R A R R V N K M W D D L E S L I H E H E S K P A P A L G D D T D Y I H D L L S I Q K E Y N L T R E Q 300
cv. Pallas .....
cv. Mentor .....
AK355475.1 .....
bowman_contig_846052 .....

                320      340      360      380      400
HORVU1Hr1G007790.1 V K A Q L V I M F G A G T D T S Y I V M E Y A M A R L M Q N P D L M T K L Q A E V R S S I P K G K H M V T E D D L N H L A Y L K A V I K E T L R L H M P A P L L V P H L A M A D C V I N G Y T I P S G T 400
cv. Pallas .....
cv. Mentor .....
AK355475.1 .....
bowman_contig_846052 .....

                420      440      460      480      500
HORVU1Hr1G007790.1 R V I V N S R A I A R D P S S W E S A E E F L P E R F M Q G G S A A A M D Y K G N G F L Y L P F G T G R R I C P G I N F A I A A I E I M L A N L V Y H F D W K L P P G S A E R G I S M T E S F G L T V H 500
cv. Pallas .....
cv. Mentor .....
AK355475.1 .....
bowman_contig_846052 .....

HORVU1Hr1G007790.1 R K D K L L V P L V P Q D Y E T 517
cv. Pallas ..... 517
cv. Mentor ..... 517
AK355475.1 ..... 517
bowman_contig_846052 ..... 517
```

## UGT85F22

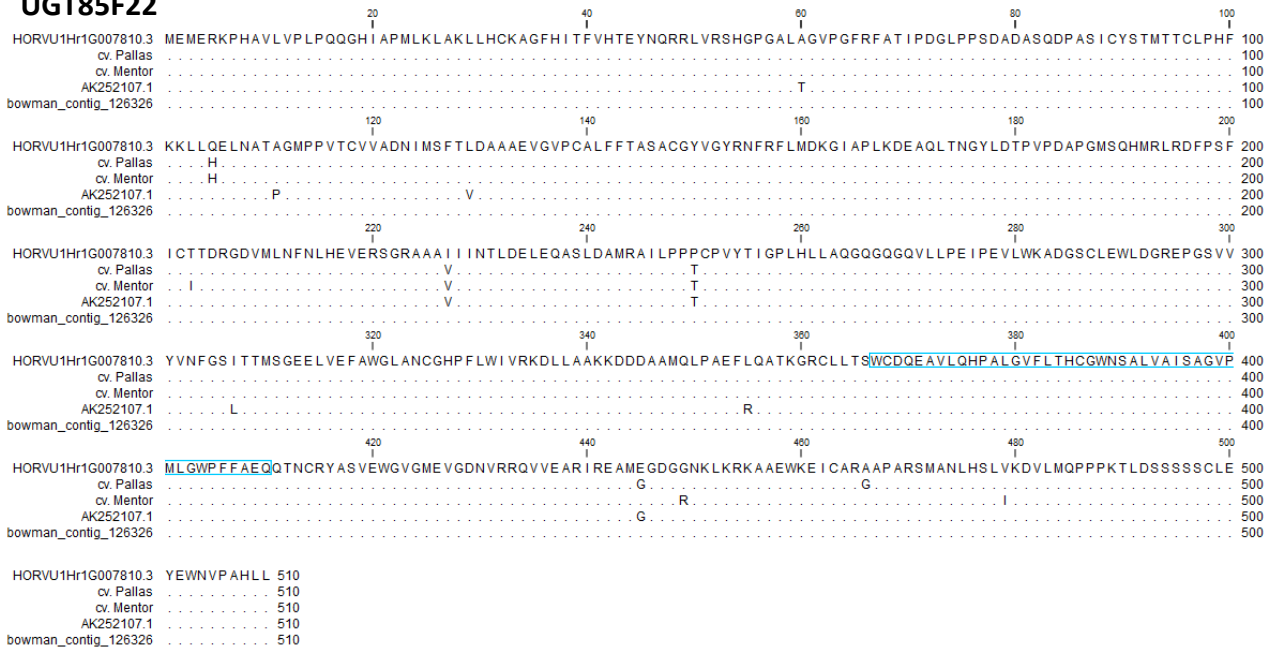

## UGT85F23

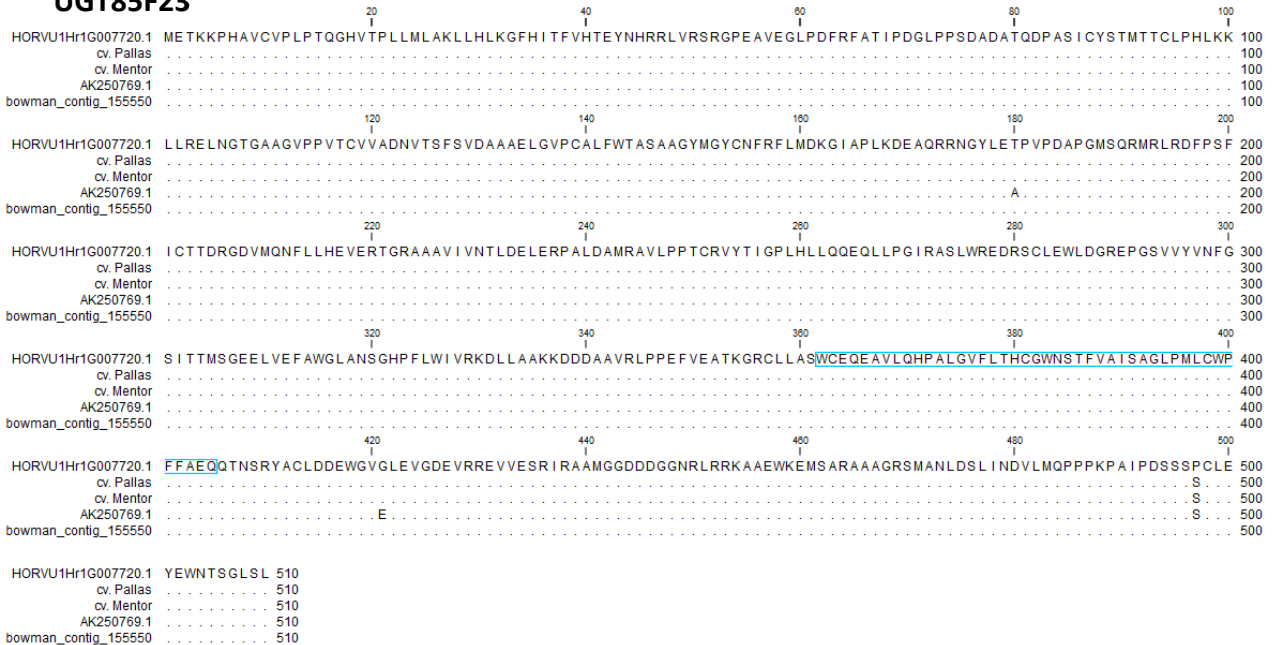

**Supplementary Figure S2. Alignment of sequenced biosynthetic genes from the cvs. Emir, Pallas, and Mentor together with the available sequence data from cv. Morex and, if available, from the cvs. Haruna Nijo (AK), Bowman (bowman\_contig), and Bonus (FJ). Gene sequences were translated to amino acid sequences. Numbers above the sequences refer to the position in the alignment; numbers next to sequences refer to the position of the last amino acid in that row within the protein. Dots indicate matching amino acids, hyphen indicates missing amino acids. Orange label shows predicted substrate recognition sites (in the order from 1 to 6), green label shows predicted cytochrome P450 cysteine heme-iron ligand signatures, blue label shows predicted UDP-glycosyltransferase signatures.**

**Supplementary Table S3. Primer sequence information for sequencing of the barley hydroxynitrile glucoside biosynthetic genes and for quantitative real-time PCR studies.**

**Sequencing primers:**

| <b>Primer</b> | <b>Sequence</b>           |
|---------------|---------------------------|
| LMJ5          | TATAAATGAGGGCTAGCTGG      |
| LMJ6          | ATCACGGAGCTGTTTGATGG      |
| LMJ7          | TCTGTGAGCGTGATGAGG        |
| LMJ8          | GATTGTCAAGATGGCCAACG      |
| LMJ10         | GCAGGTCCGGTTATTATTAAC     |
| LMJ11         | CTGATGCAGAAGGAGTAGAG      |
| LMJ12         | TACATTTACAACCTCACCGG      |
| LMJ13         | CCCAACTCAACTACGTCAAG      |
| LMJ14         | GTAGTTAGATGGTCACTTGC      |
| LMJ15         | TCAACAATCAATACTTCACTTGTGA |
| LMJ16         | TGAAGATTCCAGCTTCACC       |
| LMJ17         | TTCGTCTTCGACATCGTGTG      |
| LMJ19         | AGAGTGAACAGAACAAGC        |
| LMJ20         | TCCAATCTTGTGTGCACAAC      |
| LMJ21         | ACATCTTGTTCACTCTCCTG      |
| LMJ22         | CTTCTCCACCAACATCGTG       |
| LMJ23         | ACATAGTGATGGAATACGCC      |
| LMJ24         | TATTTACCAGTAGTGGTGCG      |
| LMJ25         | ACTACTTCTCCTCCTTGTG       |
| LMJ26         | AAGGTGATCATGCCCTTAG       |
| LMJ27         | GCTGAGCATCTCGATGATG       |
| LMJ28         | GTTGCAGCCATGAACGTG        |
| LMJ30         | CACCTCGTGGTCACAAAG        |
| LMJ31         | CCATAGCAGGTTAATTCTCC      |
| LMJ32         | ATCATCGACTGTGTTATCCG      |
| LMJ33         | CTATCGTGAAGAAGTCGTC       |
| LMJ34         | AGATAGACTACGACAGATCC      |
| LMJ35         | GCATGTCATGAACCTAGC        |
| LMJ36         | GCAGGTTGAAGTTAAGCATC      |
| LMJ37         | TGACGAACGGGTACCTC         |
| LMJ38         | CCAAGAAGGACGACGATG        |
| LMJ39         | TTAATCAGCAAGCTAGCACG      |
| LMJ40         | GGGAAGGAAATTAACATGCC      |
| LMJ41         | AAGAAGTTCTGCATCACGTC      |
| LMJ42         | GAATGGATACCTGGAGACG       |
| LMJ43         | CGTCTTCCTCACACTG          |
| LMJ78         | ATGTACCACGAGATGTTG        |
| LMJ79         | GAAGCAGGACGAGATCTT        |
| LMJ80         | GCCTGCTCCTCCAGATG         |
| LMJ81         | TTGATGAAAGTGCGCGTC        |
| LMJ82         | GTCTGCCCTACCTAAAGG        |
| LMJ83         | GCCAGATGGTTAAGATCG        |
| LMJ84         | TCAAGACCAACGACAAGG        |
| LMJ85         | TGATGGAGTATCTGCTGGC       |

LMJ86 ATAAACTGGAAAGGAGGG  
LMJ87 AACGTA TAGGTGAAAGC  
LMJ88 GCTGGCGGTAAAGAAGAG  
LMJ89 ATCTGCTACTCCACAATGAC  
LMJ90 CAGTGCGTGAGGAAGAC  
LMJ91 TCGCGTCGAACCTCATC  
LMJ92 GTTGAGTAAATAAGGGCAGT  
LMJ96 CCGAGCTACCTGCTTACA  
LMJ105 ATTGCATGTACGTTGGTTG  
LMJ108 GATTCAGGACACGTTCA  
LMJ109 CTTCGTCAATTAGCTCGT



**Quantitative real-time PCR primer sequences:**

| <b>Gene name</b>                  | <b>Accession number</b> |         | <b>Primer sequence 5' → 3'</b> |
|-----------------------------------|-------------------------|---------|--------------------------------|
| <i>CYP79A12</i>                   | HORVU1Hr1G007900        | Forward | TGCGGCAACGTCATAC               |
|                                   |                         | Reverse | GCAGAAGGAGTAGAGGAT             |
| <i>CYP71L1</i>                    | HORVU1Hr1G007830        | Forward | AAGGATGGTGGCAAAACTCG           |
|                                   |                         | Reverse | CGTCTCGTTCAGCAAGTCCAC          |
| <i>CYP71C103</i>                  | HORVU1Hr1G007840        | Forward | TCATCAACACCTATGCTATCC          |
|                                   |                         | Reverse | AGTCGAAGTGGTACATGAG            |
| <i>CYP71C113</i>                  | HORVU1Hr1G007790        | Forward | AAACACATGGTCACAGAGGA           |
|                                   |                         | Reverse | CTATTGACGATGACGCGC             |
| <i>UGT85F22</i>                   | HORVU1Hr1G007810        | Forward | TGACTTCCCCTCCTTCAT             |
|                                   |                         | Reverse | GCGGGCCAATGGTGTAAA             |
| <i>elongation factor 1 alpha</i>  | HORVU5Hr1G100200        | Forward | ACCCTGACAAGGTTCCCTTC           |
|                                   |                         | Reverse | ACCAGTCAAGTTGGTGGAC            |
| <i>small nucleolar RNA snoR14</i> | HORVU3Hr1G014770        | Forward | GATGTTTATGTATGATAGTCTGTC       |
|                                   |                         | Reverse | GTCGGGATGTATGCGTGTC            |
| <i>CWC15 homolog</i>              | HORVU7Hr1G001880        | Forward | AGCTGAGGACAGGCTTAGA            |
|                                   |                         | Reverse | ACGAGCCTGGTTCTTGAATAC          |



**Supplementary Table S5. Hydroxynitrile glucoside contents in 227 barley lines.**

|       | Name              | Total HNG | Type | Year of release or first date in the Danish national field trials | Row |
|-------|-------------------|-----------|------|-------------------------------------------------------------------|-----|
| HNG1  | Breeding line 01  | 0,00      | bl   |                                                                   |     |
| HNG2  | Hydrogen          | 0,00      | cv   | 2000                                                              | 2   |
| HNG3  | Helium            | 0,00      | cv   | 2001                                                              | 2   |
| HNG4  | Breeding line 02  | 3,32      | bl   |                                                                   |     |
| HNG5  | Breeding line 03  | 4,19      | bl   | 2011                                                              |     |
| HNG6  | Breeding line 04  | 4,46      | bl   |                                                                   |     |
| HNG7  | Breeding line 05  | 4,62      | bl   |                                                                   |     |
| HNG8  | Breeding line 06  | 12,33     | bl   |                                                                   |     |
| HNG9  | Breeding line 07  | 16,46     | bl   |                                                                   |     |
| HNG10 | Breeding line 08  | 27,50     | bl   |                                                                   |     |
| HNG11 | Breeding line 09  | 39,05     | bl   |                                                                   |     |
| HNG12 | Breeding line 10  | 43,81     | bl   |                                                                   |     |
| HNG13 | Brio              | 190,91    | cv   | 1924                                                              | 6   |
| HNG14 | Breeding line 11  | 204,13    | bl   |                                                                   |     |
| HNG15 | Breeding line 12  | 222,17    | bl   |                                                                   |     |
| HNG16 | Breeding line 13  | 249,00    | bl   |                                                                   |     |
| HNG17 | Karin             | 258,74    | cv   | 1984                                                              | 2   |
| HNG18 | Breeding line 14  | 260,41    | bl   |                                                                   |     |
| HNG19 | Bjørne            | 263,01    | lr   |                                                                   | 6   |
| HNG20 | Bryssel KVL 28    | 271,68    | lr   |                                                                   | 6   |
| HNG21 | Breeding line 15  | 273,19    | bl   |                                                                   |     |
| HNG22 | Lavrans           | 280,50    | cv   | 1999                                                              | 2   |
| HNG23 | Dønnes            | 315,16    | lr   |                                                                   | 4   |
| HNG24 | Breeding line 16  | 318,24    | bl   |                                                                   |     |
| HNG25 | Fløya             | 337,68    | cv   | 1939                                                              | 6   |
| HNG26 | Sarkalahti ME0103 | 354,56    | lr   |                                                                   | 4   |
| HNG27 | Agneta            | 370,82    | cv   | 1978                                                              | 2   |
| HNG28 | Pirkka            | 383,45    | cv   | 1952                                                              | 6   |
| HNG29 | Luusua EH0401     | 413,33    | lr   |                                                                   | 6   |
| HNG30 | Breeding line 17  | 421,21    | bl   | 2012                                                              |     |
| HNG31 | Jotun             | 469,18    | cv   | 1930                                                              | 6   |
| HNG32 | Breeding line 19  | 498,04    | bl   |                                                                   |     |
| HNG33 | Propino           | 538,55    | cv   | 2009                                                              | 2   |
| HNG34 | Solenbyg          | 579,69    | lr   |                                                                   | 6   |
| HNG35 | Fræg              | 590,28    | cv   | 1948                                                              | 6   |
| HNG36 | Breeding line 20  | 645,20    | bl   |                                                                   |     |
| HNG37 | Breeding line 21  | 741,74    | bl   | 2013                                                              |     |
| HNG38 | Breeding line 22  | 773,25    | bl   |                                                                   |     |
| HNG39 | Jadar II          | 801,04    | cv   | 1947                                                              | 6   |
| HNG40 | Bor 2             | 802,69    | cv   | 2011                                                              | 2   |
| HNG41 | Langaks           | 812,72    | lr   |                                                                   | 4   |

|       |                         |             |      |     |
|-------|-------------------------|-------------|------|-----|
| HNG42 | Juli Abed               | 928,41 cv   | 1909 | 6   |
| HNG43 | Elmeri                  | 929,55 cv   | 2009 | 2   |
| HNG44 | Kilpau ME0201           | 935,94 lr   |      | 6   |
| HNG45 | Åsa                     | 978,86 cv   | 1949 | 6   |
| HNG46 | Breeding line 24        | 991,51 bl   | 2012 |     |
| HNG47 | Breeding line 25        | 991,56 bl   |      |     |
| HNG48 | Arve                    | 1.001,97 cv | 1990 | 2   |
| HNG49 | Breeding line 26        | 1.010,07 bl |      |     |
| HNG50 | Oppdal                  | 1.081,43 lr |      | 6   |
| HNG51 | Stjernebyg fra Færøerne | 1.199,51 lr |      | 6   |
| HNG52 | SJ 095045               | 1.216,58 cv | 2011 | 2   |
| HNG53 | Breeding line 27        | 1.220,95 bl |      |     |
| HNG54 | Breeding line 28        | 1.224,51 bl | 2012 |     |
| HNG55 | Chapeau                 | 1.271,54 cv | 2010 | 2   |
| HNG56 | Bor 1                   | 1.333,97 cv | 2011 | 2   |
| HNG57 | Breeding line 29        | 1.348,63 bl |      |     |
| HNG58 | Pallas                  | 1.362,11 cv | 1958 | 6   |
| HNG59 | Ljubljana KVL 15        | 1.377,94 lr |      | 2;4 |
| HNG60 | Breeding line 30        | 1.409,69 bl |      |     |
| HNG61 | Ylenjoki AP0301         | 1.410,26 lr | 0    | 6   |
| HNG62 | Birgitta                | 1.440,44 cv | 1963 | 2   |
| HNG63 | Breeding line 31        | 1.443,05 bl |      |     |
| HNG64 | Breeding line 32        | 1.461,65 bl |      |     |
| HNG65 | Junkkari                | 1.475,20 lr |      | 6   |
| HNG66 | Breeding line 33        | 1.491,28 bl |      |     |
| HNG67 | Breeding line 35        | 1.546,92 bl |      |     |
| HNG68 | Punto                   | 1.558,13 cv | 1995 | 2   |
| HNG69 | Breeding line 36        | 1.581,92 bl |      |     |
| HNG70 | Hannuksela              | 1.616,88 lr |      | 6   |
| HNG71 | Gaute                   | 1.645,41 cv | 2000 | 2   |
| HNG72 | Breeding line 37        | 1.654,47 bl | 2012 |     |
| HNG73 | Breeding line 38        | 1.722,67 bl |      |     |
| HNG74 | Lynderupgaard           | 1.742,03 lr |      | 6   |
| HNG75 | Nordslesvigsk Kæmpe     | 1.759,81 lr |      | 6   |
| HNG76 | Vilmorin KVL 126        | 1.794,12 lr |      | 6   |
| HNG77 | Etu                     | 1.804,66 cv | 1970 | 2   |
| HNG78 | Breeding line 39        | 1.809,55 bl |      |     |
| HNG79 | Breeding line 40        | 1.827,55 bl |      |     |
| HNG80 | Eva                     | 1.844,98 cv | 1973 | 2   |
| HNG81 | Breeding line 41        | 1.847,63 bl |      |     |
| HNG82 | Breeding line 42        | 1.864,15 bl |      |     |
| HNG83 | Breeding line 43        | 1.878,06 bl |      |     |
| HNG84 | Bor 3                   | 1.895,61 cv | 2011 | 2   |
| HNG85 | Breeding line 44        | 1.896,32 bl |      |     |
| HNG86 | Breeding line 45        | 1.916,51 bl |      |     |
| HNG87 | Simba                   | 1.923,52 cv | 2002 | 2   |
| HNG88 | Nord                    | 1.976,10 cv | 1988 | 2   |
| HNG89 | Odin                    | 1.984,30 cv | 1981 | 2   |
| HNG90 | Breeding line 46        | 2.016,83 bl |      |     |
| HNG91 | Breeding line 47        | 2.027,64 bl |      |     |

|        |                    |             |      |     |
|--------|--------------------|-------------|------|-----|
| HNG92  | Caruso             | 2.046,17 cv | 1991 | 2   |
| HNG93  | Piikkiönohra       | 2.100,33 cv | 1922 | 6   |
| HNG94  | Breeding line 48   | 2.115,37 bl |      |     |
| HNG95  | Brage              | 2.122,85 cv | 2010 | 2   |
| HNG96  | Alabama            | 2.140,05 cv | 1999 | 2   |
| HNG97  | Breeding line 49   | 2.140,82 bl |      |     |
| HNG98  | Breeding line 50   | 2.147,60 bl |      |     |
| HNG99  | Denso Abed         | 2.176,19 cv | 1965 | 6   |
| HNG100 | Griechische KVL 56 | 2.179,31 lr |      | 6   |
| HNG101 | Breeding line 51   | 2.205,70 bl |      |     |
| HNG102 | Breeding line 52   | 2.258,54 bl |      |     |
| HNG103 | Zita               | 2.281,21 cv | 1974 | 2   |
| HNG104 | Anita Högsby-korn  | 2.286,50 lr |      | 2   |
| HNG105 | Breeding line 53   | 2.302,09 bl | 2011 |     |
| HNG106 | Lysimax            | 2.341,75 cv | 1994 | 2   |
| HNG107 | Breeding line 54   | 2.342,27 bl |      |     |
| HNG108 | Nue Grosse         | 2.354,56 lr |      | 2   |
| HNG109 | Breeding line 55   | 2.378,87 bl |      |     |
| HNG110 | Carlsberg          | 2.383,58 cv | 1946 | 6   |
| HNG111 | Stange             | 2.387,74 cv | 1978 | 6   |
| HNG112 | Evergreen          | 2.428,24 cv | 2010 | 2   |
| HNG113 | Breeding line 56   | 2.429,52 bl |      |     |
| HNG114 | Acclaim            | 2.440,46 cv | 2012 | 2   |
| HNG115 | Breeding line 57   | 2.449,81 bl |      |     |
| HNG116 | Breeding line 58   | 2.458,80 bl |      |     |
| HNG117 | Breeding line 59   | 2.468,42 bl |      |     |
| HNG118 | Breeding line 60   | 2.470,45 bl |      |     |
| HNG119 | Breeding line 61   | 2.473,91 bl |      |     |
| HNG120 | Karri              | 2.475,34 cv | 1967 | 6   |
| HNG121 | Breeding line 62   | 2.489,49 bl |      |     |
| HNG122 | Landora            | 2.505,71 cv | 2000 | 2   |
| HNG123 | Rauto              | 2.514,32 lr |      | 2;6 |
| HNG124 | Fairytales         | 2.520,62 cv | 2006 | 6   |
| HNG125 | Breeding line 63   | 2.524,28 bl |      |     |
| HNG126 | Hannchen           | 2.556,51 cv | 1902 | 2   |
| HNG127 | Breeding line 64   | 2.581,54 bl |      |     |
| HNG128 | Breeding line 65   | 2.609,84 bl |      |     |
| HNG129 | Simba              | 2.612,29 cv | 2002 | 2   |
| HNG130 | Gunnar             | 2.615,77 cv | 1981 | 2   |
| HNG131 | Mari               | 2.628,06 cv | 1960 | 6   |
| HNG132 | Rehakka-65         | 2.633,08 lr |      | 2   |
| HNG133 | NOS 17009-53       | 2.636,74 cv | 2011 | 2   |
| HNG134 | Iron               | 2.663,19 cv | 2007 | 2   |
| HNG135 | Breeding line 66   | 2.671,08 bl |      |     |
| HNG136 | Breeding line 67   | 2.678,31 bl |      |     |
| HNG137 | Rex Abed           | 2.691,45 cv | 1913 | 6   |
| HNG138 | Breeding line 68   | 2.709,15 bl |      |     |
| HNG139 | Breeding line 69   | 2.709,85 bl |      |     |
| HNG140 | Breeding line 70   | 2.714,30 bl |      |     |
| HNG141 | Breeding line 71   | 2.755,14 bl |      |     |

|        |                    |             |             |   |
|--------|--------------------|-------------|-------------|---|
| HNG142 | Columbus           | 2.760,81 cv | 2009        | 6 |
| HNG143 | Cicero             | 2.780,68 cv | 1999        | 2 |
| HNG144 | Breeding line 72   | 2.824,30 bl | 2013        |   |
| HNG145 | Brazil             | 2.828,48 cv | 2000        | 2 |
| HNG146 | Breeding line 73   | 2.834,06 bl |             |   |
| HNG147 | Evergreen          | 2.837,32 cv | 2010        | 2 |
| HNG148 | Breeding line 74   | 2.851,90 bl |             |   |
| HNG149 | Prominant          | 2.874,77 cv | 1999        | 2 |
| HNG150 | Breeding line 75   | 2.884,54 bl |             |   |
| HNG151 | Visir              | 2.907,49 cv | 1970        | 6 |
| HNG152 | Galant Carlberg    | 2.919,31 cv | 1985        | 2 |
| HNG153 | Alf                | 2.951,70 cv | 1978        | 2 |
| HNG154 | Breeding line 76   | 3.001,82 bl | <b>2012</b> |   |
| HNG155 | Danpro             | 3.012,44 cv | 1969        | 2 |
| HNG156 | Otira              | 3.017,75 cv | 1997        | 2 |
| HNG157 | Breeding line 77   | 3.031,57 bl |             |   |
| HNG158 | Ljubljana KVL 395  | 3.044,41 lr |             | 2 |
| HNG159 | Grenoble I KVL 131 | 3.095,01 lr |             | 6 |
| HNG160 | Breeding line 78   | 3.126,90 bl |             |   |
| HNG161 | Breeding line 79   | 3.143,85 bl |             |   |
| HNG162 | Fabel Sejet        | 3.219,70 cv | 2001        | 2 |
| HNG163 | Bor 4              | 3.222,51 cv | 2011        | 2 |
| HNG164 | Breeding line 80   | 3.292,72 bl |             |   |
| HNG165 | Breeding line 81   | 3.297,06 bl |             |   |
| HNG166 | Edvin              | 3.362,83 cv | 2008        | 2 |
| HNG167 | Sort Glatstakket   | 3.383,38 lr |             | 6 |
| HNG168 | Breeding line 82   | 3.465,03 bl |             |   |
| HNG169 | Osiris J-1277      | 3.480,84 lr |             | 6 |
| HNG170 | Hafnia             | 3.565,60 cv | 1958        | 2 |
| HNG171 | Breeding line 83   | 3.729,27 bl |             |   |
| HNG172 | Anakin             | 3.731,57 cv | 2006        | 2 |
| HNG173 | Breeding line 84   | 3.756,24 bl |             |   |
| HNG174 | Breeding line 85   | 3.821,79 bl |             |   |
| HNG175 | Tartu KVL 349      | 3.852,89 lr |             | 2 |
| HNG176 | Breeding line 86   | 3.864,31 bl |             |   |
| HNG177 | Freja              | 3.924,28 cv | 1941        | 2 |
| HNG178 | Rasmusson          | 3.930,55 cv | 2008        | 6 |
| HNG179 | Møyjar             | 4.003,41 cv | 1969        | 2 |
| HNG180 | Cluj KVL 100       | 4.058,79 lr |             | 6 |
| HNG181 | Breeding line 87   | 4.118,94 bl |             |   |
| HNG182 | Sebastian          | 4.132,03 cv | 2002        | 2 |
| HNG183 | Breeding line 88   | 4.142,60 bl |             |   |
| HNG184 | Breeding line 89   | 4.186,85 bl |             |   |
| HNG185 | Magdeburg KVL 358  | 4.193,91 lr |             | 2 |
| HNG186 | Tammi              | 4.255,87 cv | 1937        | 4 |
| HNG187 | Breeding line 90   | 4.273,26 bl |             |   |
| HNG188 | Königsberg KVL 18  | 4.273,92 lr |             | 6 |
| HNG189 | Drost Pajbjerg     | 4.308,74 cv | 1951        | 6 |
| HNG190 | Breeding line 91   | 4.390,88 bl |             | 2 |
| HNG191 | Keops              | 4.391,31 cv | 2004        | 2 |

|        |                        |              |      |   |
|--------|------------------------|--------------|------|---|
| HNG192 | Königsberg KVL 18      | 4.434,47 lr  |      | 6 |
| HNG193 | Laurikka               | 4.449,42 cv  | 2010 | 2 |
| HNG194 | Linus                  | 4.535,95 cv  | 1997 | 2 |
| HNG195 | Fero                   | 4.567,73 cv  | 1943 | 6 |
| HNG196 | NOS 16008-51           | 4.628,12 cv  | 2011 | 2 |
| HNG197 | Paavo                  | 4.648,04 cv  | 1959 | 2 |
| HNG198 | Breeding line 92       | 4.649,77 bl  | 2013 |   |
| HNG199 | Breeding line 93       | 4.675,26 bl  |      |   |
| HNG200 | Breeding line 94       | 4.816,02 bl  | 2012 |   |
| HNG201 | Orthega                | 4.822,19 cv  | 1997 | 2 |
| HNG202 | Vilm KVL 248           | 4.900,04 lr  |      | 2 |
| HNG203 | Breeding line 95       | 4.953,95 bl  | 2011 |   |
| HNG204 | Breeding line 96       | 4.981,60 bl  |      | 2 |
| HNG205 | Breeding line 97       | 5.121,29 bl  | 2011 |   |
| HNG206 | Alliot                 | 5.197,35 cv  | 1999 | 2 |
| HNG207 | Probstei/Tabor KVL 362 | 5.233,95 lr  |      | 2 |
| HNG208 | Evergreen              | 5.313,33 cv  | 2010 | 6 |
| HNG209 | Szeged KVL 347         | 5.336,44 lr  |      | 2 |
| HNG210 | Harbinger              | 5.529,21 cv  | 2009 | 2 |
| HNG211 | Oslo KVL 25            | 5.562,74 lr  |      | 6 |
| HNG212 | Jacinta                | 5.739,13 cv  | 1998 | 2 |
| HNG213 | Birka                  | 5.922,76 cv  | 1981 | 2 |
| HNG214 | NOS 15251-52           | 5.925,64 cv  | 2011 | 2 |
| HNG215 | Arla                   | 6.172,27 cv  | 1962 | 2 |
| HNG216 | Ida                    | 6.500,86 cv  | 1979 | 2 |
| HNG217 | Breeding line 98       | 6.740,28 bl  |      |   |
| HNG218 | Laukko                 | 6.908,78 lr  |      | 2 |
| HNG219 | Tartu KVL 349          | 7.059,76 lr  |      | 2 |
| HNG220 | Breeding line 99       | 7.281,33 bl  |      |   |
| HNG221 | Metz KVL 124           | 7.366,26 lr  |      | 6 |
| HNG222 | Breeding line 100      | 8.087,67 bl  |      |   |
| HNG223 | Breeding line 102      | 8.867,67 bl  |      |   |
| HNG224 | Pavia KVL 386          | 8.941,29 lr  |      | 2 |
| HNG225 | Montpellier KVL 209    | 9.944,34 lr  |      | 2 |
| HNG226 | Breeding line 103      | 10.193,43 bl |      |   |
| HNG227 | Sanette                | 10.756,40 cv | 2011 | 2 |

**Supplementary Table S6. MRM transitions (positive ionization mode) and response factors for barley hydroxynitrile glucosides.**

| Analyte                             | Retention time [min] | Q1 [m/z] | Q3 [m/z] | Collision energy [eV] | Response factor <sup>R</sup> |
|-------------------------------------|----------------------|----------|----------|-----------------------|------------------------------|
| Sutherlandin [M+H] <sup>+</sup>     | 1.20                 | 276.2    | 114.1 Q  | -14                   | 0.15                         |
|                                     |                      |          | 97.1     | -24                   |                              |
|                                     |                      |          | 69.1     | -50                   |                              |
| Epidermin [M+H] <sup>+</sup>        | 1.58                 | 262.1    | 204.0 Q  | -10                   | 1.27                         |
|                                     |                      |          | 85.2     | -19                   |                              |
|                                     |                      |          | 163.0    | -5                    |                              |
|                                     |                      |          | 126.1    | -17                   |                              |
| Osmaronin [M+H] <sup>+</sup>        | 1.69                 | 260.1    | 98.1 Q   | -14                   | 0.07                         |
|                                     |                      |          | 242      | -10                   |                              |
|                                     |                      |          | 70.2     | -30                   |                              |
| Dihydroosmaronin [M+H] <sup>+</sup> | 1.71                 | 262.1    | 100.1 Q  | -14                   | 0.06                         |
|                                     |                      |          | 142.1    | -14                   |                              |
|                                     |                      |          | 57.3     | -24                   |                              |
| Epiheterodendrin [M+H] <sup>+</sup> | 2.05                 | 262.1    | 163.1 Q  | -4                    | 2.00                         |
|                                     |                      |          | 85.2     | -18                   |                              |
|                                     |                      |          | 100.1    | -14                   |                              |

Q, quantifier ion; additional transitions are used for identification only. R; response factor compared to the internal standard amygdalin
